# Supplementary material for: Experimental and Machine Learning Studies on Chitosan-Polyacrylamide Copolymers for Selective Separation of Metal Sulfides in the Froth Flotation Process
Source: MDPI journal article supplement (doi:10.3390/colloids7020041), 2023-05-17
Supplement: s1 [file s1]

Experimental and Machine Learning Studies on Chitosan-Polyacrylamide Copolymers for Selective Separation of Metal Sulfides in Froth Flotation Process

Supplementary Information

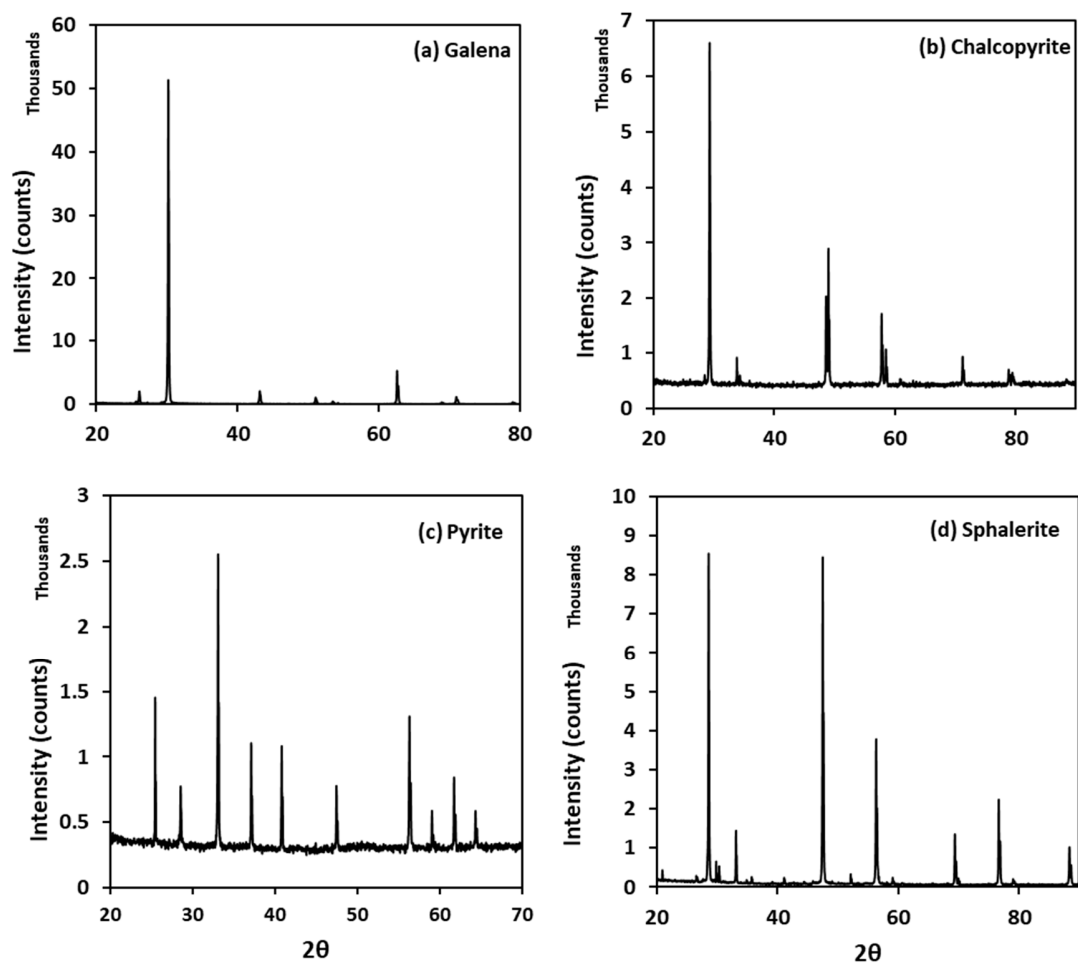

**Figure S1.** X-Ray Diffraction spectra of model sulfide minerals to illustrate purity of (a) galena; (b) chalcopyrite; (c) pyrite and (d) sphalerite.

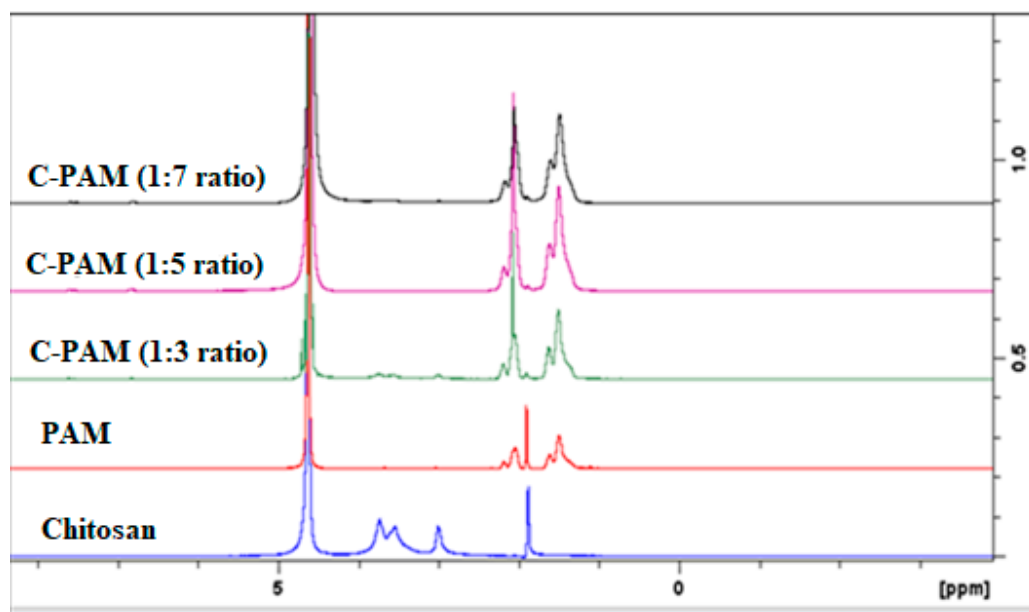

**Figure S2.**  $^1\text{H}$  NMR spectra of chitosan, PAM and C-PAMs synthesized from chitosan of 85% DD at different weight ratios of chitosan: AM.

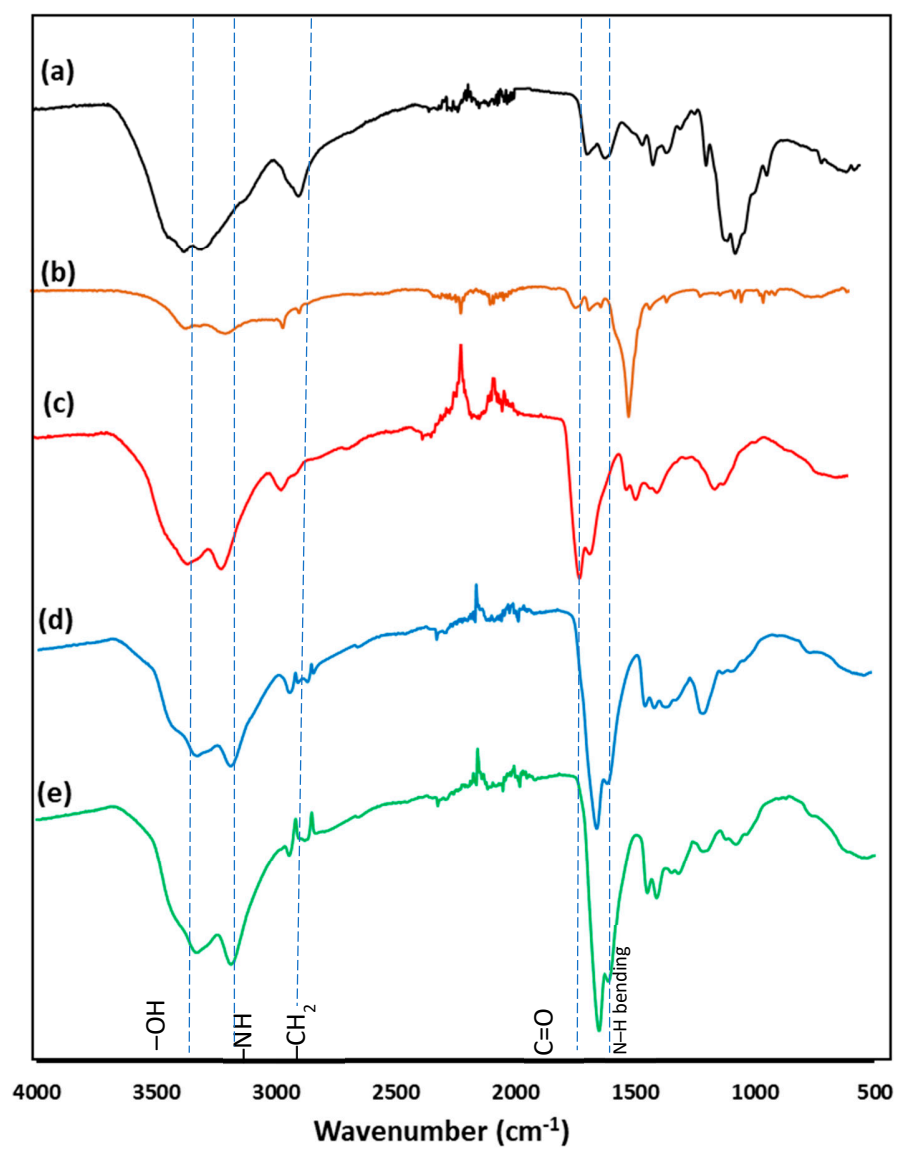

**Figure S3.** ATR-FTIR spectra of (a) chitosan of 85% DD; (b) PAM; (c) C-PAM of 1:3 ratio; (d) C-PAM of 1:5 ratio and (e) C-PAM of 1:7 ratio.

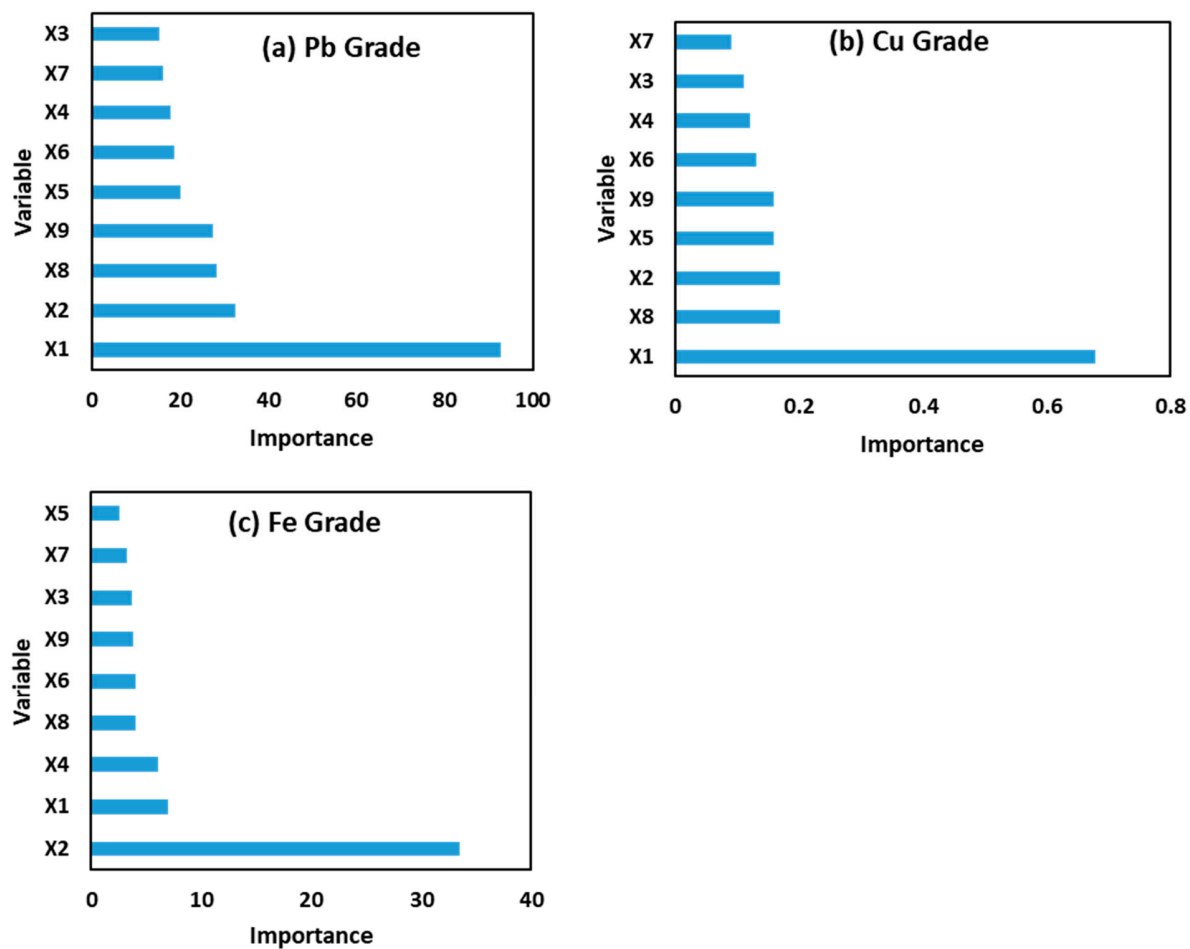

**Figure S4.** Variables importance of the random forest model inputs for the grades of (a) lead; (b) copper and (c) iron.

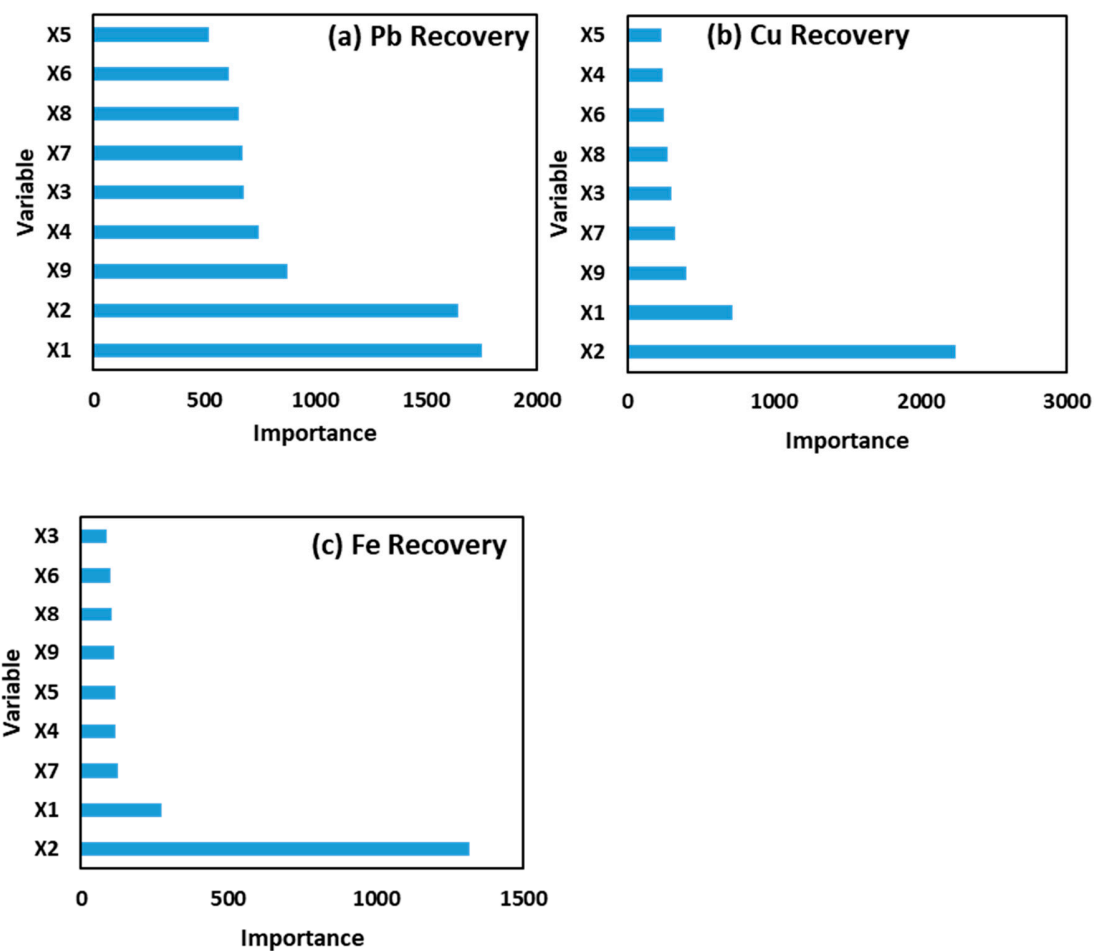

**Figure S5.** Variables importance of the random forest model inputs for the recoveries of (a) lead; (b) copper and (c) iron.

**Table S1.** ML models inputs and outputs for experiments 1-35.

| No | Inputs |    |     |     |     |     |     |      |    | Outputs (%) |         |          |        |          |         |          |         |
|----|--------|----|-----|-----|-----|-----|-----|------|----|-------------|---------|----------|--------|----------|---------|----------|---------|
|    | X1     | X2 | X3  | X4  | X5  | X6  | X7  | X8   | X9 | Pb grade    | Pb rec. | Fe grade | Fe rec | Cu grade | Cu rec. | Zn grade | Zn rec. |
| 1  | 85     | 5  | 75  | 8.5 | 500 | 600 | 75  | 1500 | 6  | 18.21       | 65.51   | 5.64     | 22.81  | 1.84     | 46.65   | 6.42     | 22.00   |
| 2  | 85     | 3  | 100 | 10  | 400 | 600 | 75  | 1250 | 3  | 15.03       | 56.09   | 5.06     | 21.25  | 1.52     | 40.21   | 5.94     | 21.14   |
| 3  | 85     | 5  | 125 | 10  | 400 | 700 | 75  | 1250 | 6  | 17.49       | 60.32   | 5.30     | 20.56  | 1.70     | 41.38   | 5.39     | 17.72   |
| 4  | 95     | 5  | 100 | 7   | 400 | 600 | 75  | 1500 | 6  | 11.32       | 31.72   | 10.07    | 31.74  | 2.05     | 40.53   | 0.70     | 1.87    |
| 5  | 85     | 5  | 100 | 10  | 500 | 600 | 100 | 1250 | 6  | 16.53       | 41.68   | 5.13     | 14.55  | 1.66     | 29.53   | 4.79     | 11.50   |
| 6  | 85     | 3  | 100 | 10  | 400 | 600 | 75  | 1250 | 8  | 18.22       | 59.38   | 5.89     | 21.57  | 1.89     | 43.46   | 5.65     | 17.54   |
| 7  | 85     | 7  | 100 | 8.5 | 400 | 600 | 50  | 1000 | 6  | 14.98       | 85.97   | 5.99     | 38.63  | 1.75     | 71.13   | 2.08     | 11.38   |

|    |    |   |     |     |     |     |     |      |   |       |       |       |       |      |       |      |       |
|----|----|---|-----|-----|-----|-----|-----|------|---|-------|-------|-------|-------|------|-------|------|-------|
| 8  | 85 | 5 | 125 | 8.5 | 400 | 600 | 50  | 1250 | 3 | 12.99 | 71.79 | 8.71  | 54.10 | 1.88 | 73.34 | 1.47 | 7.72  |
| 9  | 85 | 5 | 125 | 10  | 400 | 500 | 75  | 1250 | 6 | 16.02 | 64.95 | 10.18 | 46.39 | 2.09 | 59.90 | 1.32 | 5.09  |
| 10 | 85 | 3 | 100 | 10  | 400 | 600 | 75  | 1250 | 8 | 19.00 | 50.46 | 5.78  | 17.26 | 1.93 | 36.12 | 6.01 | 15.22 |
| 11 | 95 | 5 | 100 | 7   | 400 | 600 | 75  | 1000 | 6 | 7.80  | 28.02 | 8.37  | 33.82 | 1.60 | 40.66 | 0.71 | 2.44  |
| 12 | 85 | 5 | 125 | 8.5 | 500 | 600 | 75  | 1500 | 6 | 17.32 | 75.38 | 10.67 | 52.25 | 2.25 | 69.30 | 1.29 | 5.33  |
| 13 | 95 | 5 | 100 | 8.5 | 400 | 700 | 50  | 1250 | 6 | 9.47  | 29.47 | 9.79  | 34.26 | 1.65 | 36.35 | 0.59 | 1.75  |
| 14 | 85 | 5 | 75  | 10  | 400 | 700 | 75  | 1250 | 6 | 11.18 | 57.77 | 6.68  | 38.82 | 1.39 | 50.79 | 0.82 | 4.06  |
| 15 | 75 | 5 | 100 | 8.5 | 400 | 500 | 50  | 1250 | 6 | 20.20 | 93.86 | 8.91  | 46.58 | 2.27 | 74.69 | 1.85 | 8.18  |
| 16 | 85 | 5 | 75  | 8.5 | 400 | 600 | 100 | 1250 | 3 | 15.38 | 58.25 | 9.06  | 38.60 | 1.93 | 51.68 | 1.17 | 4.22  |
| 17 | 85 | 3 | 100 | 7   | 400 | 600 | 75  | 1250 | 8 | 15.28 | 50.68 | 4.93  | 18.40 | 1.63 | 38.27 | 5.60 | 17.71 |
| 18 | 85 | 5 | 100 | 7   | 500 | 600 | 50  | 1250 | 6 | 11.88 | 48.02 | 9.23  | 41.96 | 1.84 | 52.48 | 1.26 | 4.87  |
| 19 | 85 | 5 | 125 | 7   | 400 | 700 | 75  | 1250 | 6 | 14.28 | 41.30 | 10.47 | 34.06 | 2.45 | 49.97 | 1.37 | 3.79  |
| 20 | 85 | 5 | 75  | 8.5 | 300 | 600 | 75  | 1500 | 6 | 15.99 | 43.63 | 10.49 | 32.19 | 2.33 | 44.87 | 0.93 | 2.41  |
| 21 | 85 | 5 | 125 | 8.5 | 400 | 600 | 100 | 1250 | 3 | 12.66 | 49.46 | 8.88  | 39.04 | 1.88 | 51.84 | 1.05 | 3.92  |
| 22 | 85 | 3 | 100 | 8.5 | 300 | 700 | 75  | 1250 | 6 | 13.21 | 52.06 | 4.82  | 21.38 | 1.46 | 40.54 | 6.08 | 22.82 |
| 23 | 85 | 5 | 125 | 7   | 400 | 500 | 75  | 1250 | 6 | 11.98 | 47.17 | 8.83  | 39.10 | 1.89 | 52.59 | 1.56 | 5.84  |
| 24 | 85 | 5 | 100 | 8.5 | 400 | 600 | 75  | 1250 | 6 | 14.62 | 45.94 | 10.16 | 35.92 | 2.21 | 49.05 | 1.14 | 3.42  |
| 25 | 75 | 3 | 75  | 8.5 | 400 | 600 | 75  | 1250 | 6 | 16.33 | 54.68 | 5.54  | 20.87 | 1.67 | 39.43 | 4.36 | 13.91 |
| 26 | 85 | 5 | 125 | 8.5 | 300 | 600 | 75  | 1000 | 6 | 12.46 | 49.00 | 8.06  | 35.62 | 1.80 | 49.99 | 1.14 | 4.25  |
| 27 | 95 | 5 | 100 | 8.5 | 400 | 700 | 100 | 1250 | 6 | 9.85  | 30.17 | 9.63  | 33.20 | 1.66 | 36.01 | 0.62 | 1.81  |
| 28 | 85 | 7 | 100 | 8.5 | 300 | 700 | 75  | 1250 | 6 | 17.96 | 60.61 | 7.80  | 29.62 | 2.41 | 57.42 | 1.70 | 5.47  |
| 29 | 75 | 5 | 100 | 7   | 400 | 600 | 75  | 1000 | 6 | 23.23 | 84.92 | 9.11  | 37.48 | 2.77 | 71.63 | 2.23 | 7.77  |
| 30 | 85 | 5 | 100 | 8.5 | 400 | 500 | 75  | 1500 | 3 | 12.93 | 56.08 | 8.43  | 41.13 | 1.60 | 49.10 | 1.22 | 5.03  |
| 31 | 85 | 5 | 75  | 7   | 400 | 500 | 75  | 1250 | 6 | 14.52 | 46.81 | 9.00  | 32.63 | 2.05 | 46.69 | 1.80 | 5.53  |
| 32 | 85 | 5 | 125 | 8.5 | 300 | 600 | 75  | 1000 | 6 | 12.46 | 43.28 | 7.33  | 28.61 | 1.71 | 41.93 | 1.18 | 3.89  |
| 33 | 85 | 5 | 100 | 8.5 | 400 | 600 | 75  | 1250 | 6 | 15.15 | 56.38 | 9.26  | 38.74 | 1.92 | 50.44 | 1.45 | 5.13  |
| 34 | 95 | 3 | 125 | 8.5 | 400 | 600 | 75  | 1250 | 6 | 17.05 | 48.95 | 5.20  | 16.80 | 1.80 | 36.43 | 6.32 | 17.30 |
| 35 | 85 | 3 | 100 | 8.5 | 400 | 600 | 100 | 1500 | 6 | 17.18 | 49.69 | 5.68  | 18.48 | 1.83 | 37.32 | 6.39 | 17.61 |

**Table S 2.** ML models inputs and outputs for experiments 36-70.

| No | Inputs |    |     |     |     |     |     |      |    | Outputs (%) |         |          |        |          |         |          |         |
|----|--------|----|-----|-----|-----|-----|-----|------|----|-------------|---------|----------|--------|----------|---------|----------|---------|
|    | X1     | X2 | X3  | X4  | X5  | X6  | X7  | X8   | X9 | Pb grade    | Pb rec. | Fe grade | Fe rec | Cu grade | Cu rec. | Zn grade | Zn rec. |
| 36 | 85     | 5  | 125 | 8.5 | 300 | 600 | 75  | 1500 | 6  | 15.01       | 48.25   | 8.74     | 31.58  | 1.94     | 44.05   | 0.99     | 3.04    |
| 37 | 95     | 5  | 100 | 8.5 | 300 | 600 | 75  | 1250 | 8  | 8.53        | 26.23   | 9.65     | 33.38  | 1.55     | 33.60   | 0.59     | 1.74    |
| 38 | 85     | 7  | 100 | 8.5 | 400 | 600 | 100 | 1500 | 6  | 21.48       | 74.52   | 8.10     | 31.59  | 2.58     | 63.23   | 1.91     | 6.31    |
| 39 | 75     | 7  | 125 | 8.5 | 400 | 600 | 75  | 1250 | 6  | 18.02       | 88.48   | 9.09     | 50.21  | 2.46     | 85.27   | 2.20     | 10.29   |
| 40 | 85     | 5  | 125 | 8.5 | 500 | 600 | 75  | 1500 | 6  | 13.89       | 47.70   | 9.60     | 37.07  | 1.94     | 47.08   | 1.18     | 3.87    |
| 41 | 85     | 3  | 100 | 8.5 | 400 | 600 | 50  | 1500 | 6  | 16.06       | 51.37   | 5.22     | 18.77  | 1.67     | 37.66   | 6.10     | 18.60   |

|    |    |   |     |     |     |     |     |      |   |       |       |       |       |      |       |      |       |
|----|----|---|-----|-----|-----|-----|-----|------|---|-------|-------|-------|-------|------|-------|------|-------|
| 42 | 85 | 5 | 100 | 8.5 | 400 | 600 | 75  | 1250 | 6 | 12.48 | 49.61 | 7.99  | 35.72 | 1.64 | 46.05 | 1.02 | 3.87  |
| 43 | 85 | 5 | 100 | 8.5 | 400 | 600 | 75  | 1250 | 6 | 11.32 | 48.38 | 7.73  | 37.17 | 1.62 | 48.90 | 1.18 | 4.79  |
| 44 | 85 | 5 | 100 | 8.5 | 400 | 700 | 75  | 1500 | 3 | 13.19 | 43.92 | 8.52  | 31.92 | 1.87 | 43.96 | 1.06 | 3.35  |
| 45 | 75 | 5 | 100 | 8.5 | 400 | 700 | 50  | 1250 | 6 | 22.50 | 90.87 | 9.52  | 43.26 | 2.54 | 72.38 | 1.80 | 6.94  |
| 46 | 85 | 5 | 125 | 8.5 | 500 | 600 | 75  | 1000 | 6 | 11.04 | 48.26 | 6.10  | 29.97 | 1.40 | 43.17 | 1.05 | 4.37  |
| 47 | 85 | 5 | 75  | 7   | 400 | 700 | 75  | 1250 | 6 | 10.66 | 50.20 | 7.37  | 39.03 | 1.52 | 50.50 | 1.27 | 5.72  |
| 48 | 85 | 5 | 75  | 8.5 | 500 | 600 | 75  | 1000 | 6 | 11.02 | 49.50 | 7.71  | 38.95 | 1.57 | 49.92 | 1.44 | 6.16  |
| 49 | 95 | 5 | 100 | 8.5 | 500 | 600 | 75  | 1250 | 8 | 7.50  | 29.42 | 9.65  | 42.56 | 1.45 | 40.31 | 0.57 | 2.13  |
| 50 | 85 | 7 | 100 | 7   | 400 | 600 | 75  | 1250 | 8 | 12.07 | 86.11 | 5.01  | 40.20 | 1.52 | 76.72 | 2.44 | 16.59 |
| 51 | 95 | 7 | 75  | 8.5 | 400 | 600 | 75  | 1250 | 6 | 19.22 | 92.13 | 8.69  | 46.87 | 2.21 | 74.92 | 1.64 | 7.47  |
| 52 | 85 | 7 | 100 | 8.5 | 500 | 500 | 75  | 1250 | 6 | 12.41 | 74.85 | 6.00  | 40.72 | 1.64 | 70.06 | 1.90 | 10.93 |
| 53 | 85 | 5 | 100 | 8.5 | 400 | 500 | 75  | 1500 | 8 | 12.87 | 43.06 | 8.18  | 30.78 | 1.71 | 40.42 | 1.20 | 3.82  |
| 54 | 85 | 5 | 100 | 7   | 500 | 600 | 100 | 1250 | 6 | 12.97 | 53.78 | 8.39  | 39.10 | 1.84 | 53.98 | 1.60 | 6.31  |
| 55 | 85 | 5 | 100 | 8.5 | 400 | 600 | 75  | 1250 | 6 | 12.60 | 45.24 | 8.55  | 34.52 | 1.83 | 46.36 | 1.32 | 4.51  |
| 56 | 75 | 5 | 100 | 8.5 | 400 | 700 | 50  | 1250 | 6 | 20.84 | 90.70 | 8.84  | 43.25 | 2.32 | 71.36 | 1.61 | 6.66  |
| 57 | 85 | 5 | 100 | 7   | 300 | 600 | 100 | 1250 | 6 | 15.28 | 45.03 | 9.08  | 30.10 | 2.25 | 46.77 | 1.73 | 4.86  |
| 58 | 85 | 5 | 75  | 8.5 | 300 | 600 | 75  | 1000 | 6 | 13.05 | 43.93 | 8.37  | 31.70 | 1.90 | 45.27 | 1.41 | 4.53  |
| 59 | 85 | 7 | 100 | 10  | 400 | 600 | 75  | 1250 | 8 | 12.55 | 85.81 | 5.85  | 45.00 | 1.58 | 76.19 | 1.47 | 9.58  |
| 60 | 75 | 5 | 100 | 10  | 400 | 600 | 75  | 1500 | 6 | 24.39 | 89.98 | 9.22  | 38.27 | 2.05 | 53.57 | 1.65 | 5.79  |
| 61 | 85 | 3 | 100 | 8.5 | 400 | 600 | 50  | 1000 | 6 | 18.32 | 43.83 | 5.44  | 14.62 | 1.80 | 30.38 | 6.79 | 15.47 |
| 62 | 95 | 5 | 100 | 8.5 | 400 | 500 | 100 | 1250 | 6 | 8.40  | 27.80 | 10.12 | 37.65 | 1.49 | 34.89 | 0.58 | 1.83  |
| 63 | 95 | 5 | 100 | 8.5 | 400 | 500 | 50  | 1250 | 6 | 8.85  | 24.63 | 10.00 | 31.30 | 1.53 | 30.09 | 0.55 | 1.45  |
| 64 | 75 | 5 | 100 | 8.5 | 400 | 500 | 100 | 1250 | 6 | 22.31 | 75.18 | 10.35 | 39.21 | 2.81 | 66.93 | 2.08 | 6.70  |
| 65 | 95 | 5 | 100 | 8.5 | 400 | 700 | 50  | 1250 | 6 | 14.04 | 93.09 | 6.90  | 51.46 | 1.76 | 82.37 | 1.84 | 11.60 |
| 66 | 75 | 3 | 125 | 8.5 | 400 | 600 | 75  | 1250 | 6 | 18.81 | 49.19 | 5.85  | 17.21 | 1.93 | 35.65 | 5.08 | 12.67 |
| 67 | 85 | 7 | 100 | 7   | 400 | 600 | 75  | 1250 | 3 | 17.07 | 86.31 | 8.13  | 46.25 | 2.09 | 74.60 | 1.93 | 9.32  |
| 68 | 85 | 7 | 100 | 8.5 | 400 | 600 | 50  | 1500 | 6 | 15.76 | 76.04 | 7.94  | 43.07 | 1.98 | 67.46 | 1.56 | 7.18  |
| 69 | 95 | 3 | 75  | 8.5 | 400 | 600 | 75  | 1250 | 6 | 20.68 | 44.21 | 7.59  | 18.25 | 2.07 | 31.34 | 5.95 | 12.11 |
| 70 | 85 | 5 | 100 | 8.5 | 400 | 600 | 75  | 1250 | 6 | 13.07 | 45.91 | 8.90  | 35.14 | 1.87 | 46.43 | 1.38 | 4.60  |

**Table S3. ML models inputs and outputs for experiments 71-105.**

| No | Inputs |    |     |     |     |     |     |      |    | Outputs (%) |         |          |        |          |         |          |         |
|----|--------|----|-----|-----|-----|-----|-----|------|----|-------------|---------|----------|--------|----------|---------|----------|---------|
|    | X1     | X2 | X3  | X4  | X5  | X6  | X7  | X8   | X9 | Pb grade    | Pb rec. | Fe grade | Fe rec | Cu grade | Cu rec. | Zn grade | Zn rec. |
| 71 | 85     | 5  | 125 | 8.5 | 400 | 600 | 100 | 1250 | 8  | 12.12       | 48.44   | 9.08     | 40.83  | 1.68     | 47.34   | 1.14     | 4.36    |
| 72 | 85     | 5  | 125 | 8.5 | 400 | 600 | 50  | 1250 | 8  | 11.55       | 35.96   | 7.63     | 26.72  | 1.56     | 34.40   | 1.25     | 3.72    |
| 73 | 85     | 5  | 75  | 8.5 | 300 | 600 | 75  | 1500 | 6  | 15.09       | 51.85   | 9.72     | 37.58  | 1.89     | 45.78   | 1.29     | 4.21    |
| 74 | 75     | 5  | 100 | 8.5 | 500 | 600 | 75  | 1250 | 3  | 24.37       | 83.51   | 6.67     | 25.69  | 2.47     | 59.70   | 1.91     | 6.23    |
| 75 | 85     | 5  | 75  | 8.5 | 500 | 600 | 75  | 1000 | 6  | 10.89       | 52.95   | 7.42     | 40.54  | 1.63     | 55.93   | 1.41     | 6.53    |

|     |    |   |     |     |     |     |     |      |   |       |       |       |       |      |       |      |       |
|-----|----|---|-----|-----|-----|-----|-----|------|---|-------|-------|-------|-------|------|-------|------|-------|
| 76  | 75 | 7 | 75  | 8.5 | 400 | 600 | 75  | 1250 | 6 | 24.23 | 91.51 | 8.95  | 38.00 | 2.60 | 69.34 | 1.81 | 6.51  |
| 77  | 95 | 5 | 100 | 10  | 400 | 600 | 75  | 1500 | 6 | 15.81 | 92.66 | 8.64  | 56.92 | 1.86 | 77.22 | 1.73 | 9.64  |
| 78  | 85 | 5 | 100 | 8.5 | 400 | 700 | 75  | 1000 | 3 | 12.53 | 51.95 | 8.21  | 38.28 | 1.71 | 50.20 | 1.29 | 5.09  |
| 79  | 75 | 5 | 100 | 8.5 | 400 | 700 | 100 | 1250 | 6 | 19.16 | 97.47 | 11.36 | 64.97 | 2.26 | 81.37 | 1.64 | 7.95  |
| 80  | 75 | 5 | 100 | 8.5 | 400 | 500 | 100 | 1250 | 6 | 20.73 | 89.11 | 8.21  | 39.69 | 2.23 | 67.68 | 1.65 | 6.76  |
| 81  | 85 | 5 | 75  | 8.5 | 500 | 600 | 75  | 1500 | 6 | 11.09 | 45.43 | 11.36 | 52.32 | 1.65 | 47.86 | 1.12 | 4.39  |
| 82  | 85 | 5 | 75  | 8.5 | 300 | 600 | 75  | 1000 | 6 | 9.18  | 21.50 | 8.54  | 22.48 | 1.94 | 32.05 | 0.62 | 1.38  |
| 83  | 75 | 5 | 100 | 10  | 400 | 600 | 75  | 1000 | 6 | 18.41 | 94.86 | 8.54  | 49.49 | 2.33 | 84.68 | 2.08 | 10.19 |
| 84  | 75 | 5 | 100 | 8.5 | 400 | 700 | 100 | 1250 | 6 | 23.46 | 92.62 | 0.65  | 2.89  | 2.48 | 69.13 | 1.47 | 5.52  |
| 85  | 95 | 5 | 100 | 8.5 | 400 | 500 | 100 | 1250 | 6 | 16.35 | 96.09 | 7.39  | 48.82 | 2.07 | 85.75 | 2.05 | 11.49 |
| 86  | 85 | 3 | 100 | 7   | 400 | 600 | 75  | 1250 | 8 | 18.12 | 50.71 | 5.83  | 18.36 | 1.93 | 38.19 | 6.20 | 16.55 |
| 87  | 85 | 7 | 100 | 10  | 400 | 600 | 75  | 1250 | 8 | 15.03 | 74.74 | 6.70  | 37.46 | 1.86 | 65.43 | 1.66 | 7.88  |
| 88  | 85 | 3 | 100 | 8.5 | 500 | 700 | 75  | 1250 | 6 | 19.44 | 49.85 | 5.93  | 17.11 | 2.02 | 36.56 | 5.27 | 12.87 |
| 89  | 85 | 5 | 100 | 8.5 | 400 | 600 | 75  | 1250 | 6 | 8.92  | 27.28 | 9.56  | 32.91 | 1.59 | 34.37 | 0.60 | 1.75  |
| 90  | 75 | 5 | 100 | 8.5 | 500 | 600 | 75  | 1250 | 8 | 13.41 | 75.24 | 9.41  | 59.33 | 1.79 | 71.12 | 1.37 | 7.33  |
| 91  | 85 | 5 | 100 | 8.5 | 400 | 500 | 75  | 1000 | 3 | 7.29  | 24.81 | 8.59  | 32.90 | 1.46 | 35.03 | 0.62 | 2.03  |
| 92  | 95 | 5 | 100 | 10  | 400 | 600 | 75  | 1000 | 6 | 16.50 | 92.57 | 6.20  | 39.14 | 1.86 | 73.86 | 2.03 | 10.88 |
| 93  | 85 | 5 | 125 | 8.5 | 500 | 600 | 75  | 1000 | 6 | 8.67  | 19.87 | 8.76  | 22.59 | 1.47 | 23.74 | 0.50 | 1.09  |
| 94  | 85 | 5 | 100 | 10  | 300 | 600 | 100 | 1250 | 6 | 16.75 | 95.04 | 5.92  | 37.80 | 1.84 | 73.73 | 2.29 | 12.37 |
| 95  | 85 | 7 | 100 | 10  | 400 | 600 | 75  | 1250 | 3 | 13.86 | 78.96 | 6.38  | 40.90 | 1.77 | 71.12 | 1.72 | 9.37  |
| 96  | 75 | 5 | 100 | 8.5 | 400 | 500 | 50  | 1250 | 6 | 17.26 | 71.87 | 10.41 | 48.72 | 2.21 | 64.93 | 1.75 | 6.96  |
| 97  | 95 | 5 | 100 | 8.5 | 400 | 700 | 100 | 1250 | 6 | 20.69 | 99.73 | 7.81  | 42.34 | 2.43 | 82.57 | 2.13 | 9.78  |
| 98  | 85 | 3 | 100 | 8.5 | 500 | 500 | 75  | 1250 | 6 | 18.53 | 50.42 | 5.97  | 18.26 | 2.01 | 38.72 | 6.12 | 15.86 |
| 99  | 85 | 5 | 75  | 8.5 | 400 | 600 | 100 | 1250 | 8 | 21.27 | 96.67 | 6.93  | 35.42 | 2.23 | 71.55 | 2.35 | 10.17 |
| 100 | 75 | 5 | 100 | 8.5 | 300 | 600 | 75  | 1250 | 3 | 17.77 | 71.39 | 11.12 | 50.22 | 2.33 | 66.21 | 1.64 | 6.27  |
| 101 | 95 | 5 | 100 | 8.5 | 300 | 600 | 75  | 1250 | 3 | 19.98 | 84.35 | 6.95  | 32.97 | 2.32 | 69.15 | 2.10 | 8.45  |
| 102 | 85 | 5 | 100 | 8.5 | 400 | 500 | 75  | 1000 | 8 | 19.21 | 93.24 | 6.74  | 36.81 | 2.15 | 73.57 | 2.62 | 12.12 |
| 103 | 85 | 5 | 100 | 10  | 300 | 600 | 50  | 1250 | 6 | 20.30 | 95.72 | 6.83  | 36.25 | 2.04 | 67.86 | 2.11 | 9.50  |
| 104 | 85 | 7 | 100 | 8.5 | 500 | 700 | 75  | 1250 | 6 | 14.69 | 79.97 | 6.04  | 36.99 | 1.81 | 69.58 | 1.72 | 8.91  |
| 105 | 85 | 5 | 100 | 8.5 | 400 | 700 | 75  | 1000 | 8 | 18.18 | 96.92 | 7.28  | 43.65 | 2.18 | 82.09 | 2.17 | 11.00 |

**Table S4.** ML models inputs and outputs for experiments 106-130

| No  | Inputs |    |     |     |     |     |    |      |    | Outputs (%) |         |          |        |          |         |          |         |
|-----|--------|----|-----|-----|-----|-----|----|------|----|-------------|---------|----------|--------|----------|---------|----------|---------|
|     | X1     | X2 | X3  | X4  | X5  | X6  | X7 | X8   | X9 | Pb grade    | Pb rec. | Fe grade | Fe rec | Cu grade | Cu rec. | Zn grade | Zn rec. |
| 106 | 95     | 7  | 125 | 8.5 | 400 | 600 | 75 | 1250 | 6  | 20.32       | 92.19   | 8.68     | 44.30  | 2.30     | 73.70   | 1.58     | 6.82    |
| 107 | 75     | 5  | 100 | 8.5 | 300 | 600 | 75 | 1250 | 8  | 18.96       | 69.46   | 10.57    | 43.56  | 2.44     | 63.18   | 1.48     | 5.16    |
| 108 | 75     | 5  | 100 | 7   | 400 | 600 | 75 | 1500 | 6  | 14.92       | 82.47   | 9.86     | 61.32  | 2.06     | 80.29   | 1.56     | 8.24    |
| 109 | 85     | 5  | 100 | 8.5 | 400 | 600 | 75 | 1250 | 6  | 18.37       | 96.30   | 7.42     | 43.73  | 2.15     | 79.75   | 2.04     | 10.20   |



|     |    |   |     |     |     |     |     |      |   |       |       |      |       |      |       |      |       |
|-----|----|---|-----|-----|-----|-----|-----|------|---|-------|-------|------|-------|------|-------|------|-------|
| 110 | 85 | 3 | 100 | 7   | 400 | 600 | 75  | 1250 | 3 | 18.49 | 56.21 | 0.71 | 2.43  | 1.99 | 42.73 | 7.22 | 20.91 |
| 111 | 85 | 5 | 125 | 8.5 | 300 | 600 | 75  | 1500 | 6 | 22.64 | 96.97 | 7.96 | 38.32 | 2.52 | 76.13 | 2.01 | 8.21  |
| 112 | 85 | 5 | 100 | 7   | 300 | 600 | 50  | 1250 | 6 | 22.19 | 96.20 | 7.40 | 36.06 | 2.47 | 75.70 | 2.13 | 8.82  |
| 113 | 85 | 5 | 75  | 10  | 400 | 500 | 75  | 1250 | 6 | 18.86 | 92.64 | 6.94 | 38.32 | 2.03 | 70.41 | 2.15 | 10.05 |
| 114 | 85 | 7 | 100 | 8.5 | 400 | 600 | 100 | 1000 | 6 | 15.52 | 80.30 | 6.09 | 35.43 | 1.79 | 65.50 | 1.88 | 9.27  |
| 115 | 85 | 5 | 100 | 8.5 | 400 | 600 | 75  | 1250 | 6 | 19.42 | 92.98 | 6.97 | 37.51 | 2.15 | 72.89 | 2.08 | 9.51  |
| 116 | 85 | 7 | 100 | 8.5 | 300 | 500 | 75  | 1250 | 6 | 11.19 | 84.45 | 5.36 | 45.50 | 1.48 | 79.14 | 1.57 | 11.32 |
| 117 | 85 | 3 | 100 | 7   | 400 | 600 | 75  | 1250 | 3 | 20.41 | 45.93 | 5.63 | 14.23 | 2.02 | 32.06 | 7.09 | 15.21 |
| 118 | 85 | 5 | 100 | 10  | 500 | 600 | 50  | 1250 | 6 | 17.36 | 93.03 | 6.65 | 40.08 | 1.89 | 71.36 | 2.02 | 10.33 |
| 119 | 95 | 5 | 100 | 8.5 | 500 | 600 | 75  | 1250 | 3 | 17.66 | 94.53 | 7.10 | 42.76 | 2.08 | 78.61 | 2.03 | 10.37 |
| 120 | 85 | 5 | 100 | 8.5 | 400 | 700 | 75  | 1500 | 8 | 20.02 | 94.65 | 7.36 | 39.15 | 2.04 | 68.26 | 1.90 | 8.58  |
| 121 | 85 | 7 | 100 | 7   | 400 | 600 | 75  | 1250 | 8 | 13.87 | 85.13 | 6.16 | 42.48 | 1.69 | 73.19 | 1.90 | 11.12 |
| 122 | 85 | 5 | 100 | 8.5 | 400 | 600 | 75  | 1250 | 6 | 18.63 | 91.49 | 7.07 | 39.06 | 2.18 | 75.51 | 2.36 | 11.07 |
| 123 | 85 | 5 | 75  | 8.5 | 400 | 600 | 50  | 1250 | 3 | 17.90 | 90.53 | 6.40 | 36.40 | 1.94 | 69.43 | 1.92 | 9.27  |
| 124 | 85 | 5 | 75  | 8.5 | 400 | 600 | 50  | 1250 | 8 | 18.71 | 99.94 | 6.68 | 40.15 | 1.89 | 71.40 | 1.89 | 9.64  |
| 125 | 85 | 3 | 100 | 8.5 | 400 | 600 | 100 | 1000 | 6 | 14.78 | 49.84 | 5.19 | 19.70 | 1.72 | 41.04 | 6.70 | 21.53 |
| 126 | 85 | 7 | 100 | 10  | 400 | 600 | 75  | 1250 | 3 | 13.19 | 44.80 | 7.06 | 26.95 | 1.76 | 42.31 | 0.96 | 3.11  |
| 127 | 95 | 5 | 100 | 8.5 | 400 | 500 | 50  | 1250 | 6 | 19.29 | 93.85 | 7.02 | 38.38 | 2.16 | 74.40 | 2.05 | 9.50  |
| 128 | 85 | 3 | 100 | 8.5 | 300 | 500 | 75  | 1250 | 6 | 16.88 | 51.70 | 5.55 | 19.12 | 1.87 | 40.37 | 6.29 | 18.37 |
| 129 | 85 | 3 | 100 | 10  | 400 | 600 | 75  | 1250 | 3 | 18.07 | 52.12 | 5.04 | 16.36 | 1.60 | 32.62 | 5.90 | 16.21 |
| 130 | 85 | 7 | 100 | 7   | 400 | 600 | 75  | 1250 | 3 | 11.37 | 63.51 | 3.06 | 19.25 | 1.14 | 44.99 | 1.02 | 5.42  |
